# Supplementary material
Source: Elsevier journal article supplement (https://www.sciencedirect.com/science/article/pii/S2387020620300437)
Supplement: mmc1 [file S2387020620300437:mmc1.docx]

Tabla Suplementaria 1. Listado de ítems de la escala de validación.

| **Durante los últimos 3 meses, ¿Hasta qué punto le ha/han preocupado...** |
| --- |
| 1. el sangrado abundante durante la menstruación? |
| 2. expulsar coágulos de sangre durante la menstruación? |
| 3. los cambios constantes en la duración de la menstruación comparada con sus menstruaciones anteriores? |
| 4. los cambios constantes en la duración del tiempo que va desde una menstruación hasta la siguiente comparado con sus ciclos anteriores? |
| 5. la sensación de pesadez o presión en la parte inferior del abdomen. |
| 6. orinar frecuentemente durante el día? |
| 7. orinar frecuentemente durante la noche? |
| 8. la sensación de cansancio? |
| 9. han hecho que se sintiera preocupada por la aparición o duración imprevisible de sus períodos? |
| 10. han hecho que se sintiera preocupada a la hora de viajar? |
| 11. han interferido en sus actividades físicas? |
| 12. han hecho que se sintiera cansada o agotada? |
| 13. han hecho que redujera el tiempo destinado al ejercicio o a otras actividades físicas? |
| 14. han hecho que sintiera que no controlaba su vida? |
| 15. han hecho que le preocupara ensuciar la ropa interior? |
| 16. han hecho que se sintiera menos productiva? |
| 17. han hecho que se sintiera adormilada o somnolienta durante el día? |
| 18. han hecho que se sintiera avergonzada por un aumento de peso? |
| 19. han hecho que sintiera que era difícil realizar sus actividades habituales? |
| 20. han interferido en sus actividades sociales? |
| 21. han hecho que se sintiera avergonzada por el tamaño y aspecto de su barriga? |
| 22. han hecho que le preocupara ensuciar la ropa de cama? |
| 23. han hecho que se sintiera triste, desanimada o desesperada? |
| 24. han hecho que se sintiera deprimida y con la moral baja? |
| 25. han hecho que se sintiera derrotada? |
| 26. han hecho que se preocupara por su salud? |
| 27. han hecho que planeara sus actividades con más cuidado? |
| 28. han hecho que se sintiera molesta por tener que llevar siempre compresas, tampones y ropa de recambio para evitar accidentes? |
| 29. han hecho que sintiera vergüenza? |
| 30. han hecho que se sintiera insegura de cara al futuro? |
| 31. han hecho que se sintiera irritable? |
| 32. han hecho que le preocupara ensuciar la ropa (falda, pantalón…)? |
| 33. han influido en la talla de la ropa que viste durante sus períodos? |
| 34. han hecho que sintiera que no tiene control sobre su salud? |
| 35. han hecho que se sintiera débil como si se le escapara la energía del cuerpo? |
| 36. han disminuido su deseo sexual? |
| 37. han hecho que evitara las actividades sexuales? |

Cada ítem puntúa en una escala del uno al cinco: 1=nada; 2=un poco; 3=algo; 4=bastante; 5= muchísimo.
